# Supplementary material
Source: PubMed Central journal article supplement (PMC5609852)
Supplement: NIHMS904891-supplement-Supplement.pdf [file NIHMS904891-supplement-Supplement.pdf]

## Supporting Information

### Constrained Mixed-Effect Models with Ensemble Learning for Prediction of Nitrogen Oxide Concentrations at a High Spatiotemporal Resolution

Lianfa Li<sup>\*,1,2</sup>, Fred Lurmann<sup>3</sup>, Rima Habre<sup>\*,1</sup>, Robert Urman<sup>1</sup>, Edward Rappaport<sup>1</sup>, Beate Ritz<sup>4</sup>,

Jiu-Chiuan Chen<sup>1</sup>, Frank D. Gilliland<sup>1</sup>, Jun Wu<sup>\*,5</sup>

1. Department of Preventive Medicine, University of Southern California, Los Angeles, CA, USA

2. State Key Laboratory of Resources and Environmental Information System, Institute of Geographical Sciences and Natural Resources, Chinese Academy of Sciences, Beijing, China

3. Sonoma Technology, Inc., Petaluma, CA, USA

4. Department of Epidemiology, University of California, Los Angeles, CA, USA

5. Program in Public Health, College of Health Sciences, University of California, Irvine, CA, USA

\*Corresponding authors' contact information: Lianfa Li: Phone, 650-388-0268; Email, [lianfali@usc.edu](mailto:lianfali@usc.edu) or [lspatial@gmail.com](mailto:lspatial@gmail.com). Rima Habre: Phone, 323-442-8283; Email, [habre@usc.edu](mailto:habre@usc.edu). Jun Wu: Phone, 949-824-0548; Email, [junwu@uci.edu](mailto:junwu@uci.edu).

Number of pages: 21

Number of figures: 8

Number of tables: 4

# Contents

|                                                                                                                                                                                                                        |           |
|------------------------------------------------------------------------------------------------------------------------------------------------------------------------------------------------------------------------|-----------|
| <b>1. Overview</b> .....                                                                                                                                                                                               | S1        |
| <b>2. Measurements of NO<sub>2</sub> and NO<sub>x</sub> concentrations</b> .....                                                                                                                                       | S1        |
| <b>3. The Covariates Selected</b> .....                                                                                                                                                                                | S1        |
| <b>3.1 CALINE4-estimated concentrations from local traffic emissions</b> .....                                                                                                                                         | <b>S1</b> |
| <b>3.2 Traffic density</b> .....                                                                                                                                                                                       | S2        |
| <b>4. Modeling Approach</b> .....                                                                                                                                                                                      | S2        |
| <b>4.1 Non-parametric additive methods</b> .....                                                                                                                                                                       | S2        |
| <b>4.2 Modeling of spatial random effects</b> .....                                                                                                                                                                    | S3        |
| <b>4.3 Aggregated predictions by ensemble learning</b> .....                                                                                                                                                           | S3        |
| <b>Table S1.</b> Correlation between average biweekly passive measurements at USC, UCLA, and UCI sites & collocated routine monitoring sites, and their linear regression coefficients used for consistent adjustment  | S5        |
| <b>Table S2.</b> Variance explained by the predictors included in the Stage 1 mixed effects model .....                                                                                                                | S6        |
| <b>Table S3.</b> NO <sub>2</sub> model performance by CHS community in cross validation .....                                                                                                                          | S7        |
| <b>Table S4.</b> NO <sub>x</sub> model performance by CHS community in cross validation .....                                                                                                                          | S8        |
| <b>Figure S1.</b> Study region with routine monitoring locations and USC sampling locations (the UCLA and UCI data are not shown due to IRB restrictions) .....                                                        | S9        |
| <b>Figure S2.</b> Histograms for NO <sub>2</sub> and NO <sub>x</sub> to determine log-transformation (no log transformation for NO <sub>2</sub> ; log transformation for NO <sub>x</sub> ).....                        | S10       |
| <b>Figure S3.</b> The first and second temporal basis functions to reflect the seasonal variability for the study region .....                                                                                         | S11       |
| <b>Figure S4.</b> Non-linear association between predictive variables and concentrations by mixed models .....                                                                                                         | S12       |
| <b>Figure S5.</b> Spatial topology for spatial effect modeling by Thiessen polygons (aggregate distance: 500 m) .....                                                                                                  | S14       |
| <b>Figure S6.</b> Residual plot between observed values vs. residuals (a. NO <sub>2</sub> ; b. NO <sub>x</sub> ) for the sample selected by bootstrap aggregating.....                                                 | S15       |
| <b>Figure S7.</b> Spatial distribution of the predicted and observed NO <sub>2</sub> and NO <sub>x</sub> concentration means across the CHS communities .....                                                          | S16       |
| <b>Figure S8.</b> Boxplot for correlation between constrained prediction and observed values for the time series of 51 routine monitoring stations .....                                                               | S17       |
| <b>Figure S9.</b> Time series simulated for the routine monitoring sites with the minimum correlation between constrained prediction and observed values (a.0.55 for NO <sub>2</sub> ; 0.70 for NO <sub>x</sub> )..... | S18       |
| <b>Figure S10.</b> Summer (a) and winter (b) averages of the 2005-2006 biweekly NO <sub>x</sub> at the CHS subject locations for San Dimas .....                                                                       | S20       |



## 1 **1. Overview**

2 This paper proposed a three-stage spatiotemporal model that can reliably predict  
3 nitrogen oxide concentrations with a high spatiotemporal resolution over a long time  
4 span (>20 years). The spatially extensive highly-clustered exposure data from  
5 short-term measurement campaigns across 1-2 years and long-term central site  
6 monitoring in 1992-2013 were leveraged to develop the first stage mixed-effect  
7 models and the second stage ensemble learning with uncertainty estimates. Then at  
8 the third stage, constrained optimization was designed and implemented based on the  
9 point estimates from the first and second stages to simulate the long-term series of  
10 pollutant concentrations for any target location in the study region. The following  
11 sections provide the supplemental information about concentration measurements, the  
12 covariates selected, modeling method, and results to support the formal paper.

## 13 **2. Measurements of NO<sub>2</sub> and NO<sub>x</sub> concentrations**

14 Besides the measurements of routine monitoring stations, additional data were  
15 generated in intensive field measurement campaigns conducted by the University of  
16 Southern California (USC), University of California Los Angeles (UCLA), and  
17 University of California Irvine (UCI), respectively. Passive diffusion-based Ogawa  
18 samplers <sup>1</sup> were used to measure NO<sub>2</sub> and NO<sub>x</sub> at different time periods and at  
19 different locations (e.g. outside homes, schools, strategic outdoor sampling locations,  
20 and central monitoring sites). Our previous papers respectively provide more details  
21 about the measurement methods that generated the USC <sup>2</sup>, UCLA <sup>3</sup> and UCI <sup>4</sup> samples.  
22 [Figure S1](#) also shows the locations for the routine and USC sampling sites [the UCI  
23 and UCLA sampling locations are concealed to comply with specific requirements by  
24 their Institutional Review Boards].

25 To minimize systematic bias in the field campaign data, we compared the passive  
26 data with the active data from the routine government monitors at the co-located sites  
27 and made small adjustments to standardize the passive measurements to Federal  
28 Reference Method equivalent values. For details, please refer to [Table S1](#).

## 29 **3. The Covariates Selected**

### 30 **3.1 CALINE4-estimated concentrations from local traffic emissions**

31 CALINE4 is a line source dispersion model that was used to assess the

32 contribution of local motor vehicle emissions to ambient concentrations<sup>5, 6</sup>.  
 33 CALINE4 was used to compute mean NO<sub>x</sub> concentration from emissions on freeways  
 34 [coded using Feature Class Codes (FCC) as FCC1] and non-freeways (FCC2, FCC3  
 35 and FCC4). Traffic count data were obtained from Caltrans and TeleAtlas/GDT and  
 36 assigned to ERSI Premium Street Map roadway geometry. Emission strength was  
 37 estimated using quarterly average daily traffic volumes and EMFAC2011 (for  
 38 1992-2012)<sup>7</sup> and EMFAC2014 (for 2013)<sup>8</sup>, which generated air basin emission  
 39 factors that were based on average vehicle speed and heavy-duty truck fraction  
 40 (Caltrans post-mile truck count data by year). Wind speeds and directions were  
 41 based on hourly observations of these surface meteorological variables from 72  
 42 monitoring stations of California<sup>8</sup>.

### 43 **3.2 Traffic density**

44 Traffic density represents distance-decayed annual average daily traffic (AADT)  
 45 volume in both directions from all roads (FCC1-FCC4) within a circular buffer.  
 46 Traffic density is symmetric on both sides of each roadway, computed as if the wind  
 47 directions were uniformly distributed around the compass. The values of traffic  
 48 density were computed by the ESRI ArcGIS density function using a kernel with a  
 49 300 m search radius and 5 m grid resolution. Annual traffic density estimates were  
 50 provided for the regulatory monitoring sites and local sampling locations. In  
 51 addition, because these cover a long time period, the traffic densities were scaled by  
 52 the South Coast Air Basin (SoCAB) EMFAC2011 vehicle fleet average NO<sub>x</sub> emission  
 53 factor for 50 mph and 6% heavy-duty vehicle fraction (normalized to 1.00 in 2002  
 54 since we used the 2002 AADT as the baseline data) to reflect the composite trend in  
 55 traffic volumes and emissions over time.

## 56 **4. Modeling Approach**

### 57 **4.1 Non-parametric additive methods**

58 For spatiotemporal factors, we adopted non-parametric additive methods to  
 59 model non-linear effects. Specifically, we used non-parametric trend functions to  
 60 quantify the association,  $s(\dots)$ , i.e. approximated by the weighted sum of polynomial  
 61 spline (B-spline basis) functions

$$62 \quad x_{min} = \zeta_0 < \zeta_1 < \zeta_2 \dots < \zeta_{m-1} < \zeta_m = x_{max} \quad (S1)$$

$$63 \quad f(x_i) = \sum_j \beta_{ij} B_{ij}(x_i) \quad (S2)$$

64 where  $\zeta_i$  is the split for an interval for the covariate  $x_i$  ( $\zeta_0$  and  $\zeta_m$  are respectively the  
 65 minimum and maximum values of  $x_i$ ),  $B_{ij}$  and  $\beta_{ij}$  respectively represent the basis  
 66 function and parameter for the interval  $j$  for the covariate  $x_i$ . Penalized maximum

67 likelihood was used to solve (eq. S2) to estimate  $\beta_{ij}$ .

## 68 4.2 Modeling of spatial random effects

69 By estimating a structured component and an unstructured component, we can  
 70 distinguish between the two sources of spatial autocorrelations<sup>9</sup>. The spatial effects  
 71 were modeled using the following formulas for both structured (S3) and unstructured  
 72 spatial effects (S4).

$$73 \quad f_s(r_s)|f_s(r'), r' \neq r_s, \tau_{str}^2 \sim N\left(\frac{1}{N_{r_s}} \sum_{r' \in \delta_{r_s}} f_s(r'), \frac{\tau_{str}^2}{N_{r_s}}\right) \quad (S3)$$

$$74 \quad f_{re}(r_s)|\tau_{unstr}^2 \sim N(0, \tau_{unstr}^2) \quad (S4)$$

75 where  $r_s$  is the region where the observation  $y(s,t)$  is located,  $\delta_{r_s}$  represents a set of  
 76 neighbors ( $r'$ ) of the polygon  $r_s$ ,  $N_{r_s}$  is the number of neighboring polygons for  $r_s$ ,  
 77  $\tau_{str}^2$  is the total variance for the structured component,  $\tau_{str}^2 \sim \text{IG}(a,b)$ .  $f_s(r')$  in (eq.  
 78 S3) represents the spatial influence from neighboring polygons ( $r'$ ) on  $r_s$ ;  $f_{re}(r_s)$  in (eq.  
 79 S4) represents the unstructured spatial effect with zero mean and standard deviation  
 80 ( $\tau_{unstr}^2$ ) for  $r_s$ .

81 Thiessen polygons were constructed around the central points (derived by  
 82 averaging the coordinates of all the routine or/and campaigns sampling locations  
 83 within a certain distance) to simulate spatial effects. Rook adjacency was used for  
 84 spatial adjacency: two polygons were assumed to be neighbors if they share a  
 85 common border. We conducted sensitivity tests for a series of aggregation distances  
 86 (100 m, 300 m, 500 m and 3 km) and finally selected an optimal aggregate distance  
 87 (500 m) that provided a good balance between model accuracy and computing  
 88 efficiency. We used the packages of `rgdal` and `spdep` in the statistics software R  
 89 (Version 3.3) for generation of the Thiessen polygons with their spatial weight matrix.

## 90 4.3 Aggregated predictions by ensemble learning

91 The aggregated predictions (mean and standard deviation) are the weighted  
 92 summary of all trained models, where the weighting is the square of each model's  $R^2$ .

$$93 \quad m_f(s, t) = \sum_i h_i(d_b, f_r) w_i \quad (S5)$$

$$94 \quad \sigma_f(s, t) = \sqrt{\frac{\sum_i w_i (h_i(d_b, f_r) - m_f(s, t))^2}{\frac{M-1}{M} \sum_i w_i}} \quad (S6)$$

$$95 \quad w_i = R_i^2 / \sum_i R_i^2 \quad (S7)$$

96 where  $m_f(s, t)$  is the aggregated prediction (the weighted mean),  $h_i(d_b, f_r)$  is the  
 97 prediction by the  $i^{\text{th}}$  spatiotemporal model (eq. 1) trained using the bootstrap sample  
 98 ( $d_b$ ) and selected set of predictors ( $f_r$ );  $w_i$  is the normalized weight derived from the  $i^{\text{th}}$

99 model's performance measure;  $\sigma_f(s, t)$  is the standard deviation from the output of  
100 multiple models,  $M$  is the number of nonzero weights.

101

Table S1. Correlation between average biweekly passive measurements at USC, UCLA, and UCI sites and collocated routine monitoring sites, and their linear regression coefficients used for consistent adjustment

| Cover | Pollutant         | Number of collocated locations | Sampling period         | Correlation coefficient   | Parameters |            |      |
|-------|-------------------|--------------------------------|-------------------------|---------------------------|------------|------------|------|
|       |                   |                                |                         |                           | Slope      | Intercepts |      |
| USC   | ICV1 <sup>a</sup> |                                | NO <sub>2</sub>         | Mixed dates for 2009-2013 | 0.94       | 0.89       | 3.57 |
|       |                   |                                | NO <sub>x</sub>         | Mixed dates for 2009-2013 | 0.93       | 0.83       | 6.23 |
|       | ICV2 <sup>a</sup> |                                | NO <sub>2</sub>         | Mixed dates for 2009-2013 | 0.92       | 0.84       | 3.98 |
|       |                   |                                | NO <sub>x</sub>         | Mixed dates for 2009-2013 | 0.96       | 0.82       | 5.40 |
| UCLA  | NO <sub>2</sub>   | 14                             | Sept. 9- Sept. 22, 2006 | 0.94                      | 0.68       | 4.43       |      |
|       |                   |                                | Feb. 10- Feb. 23, 2007  | 0.95                      | 1.00       | 0.29       |      |
|       | NO <sub>x</sub>   | 14                             | Sept. 9- Sept. 22, 2006 | 0.98                      | 0.80       | 2.38       |      |
|       |                   |                                | Feb. 10- Feb. 23, 2007  | 0.97                      | 0.81       | 12.05      |      |
| UCI   | NO <sub>2</sub>   | 11                             | Jul. 10- Jul. 18, 2009  | 0.98                      | 0.88       | 5.20       |      |
|       |                   |                                | Jul. 24-Aug. 1, 2009    | 0.99                      | 0.94       | 3.56       |      |
|       |                   |                                | Nov. 13-Nov. 21, 2009   | 0.996                     | 0.58       | 12.91      |      |
|       |                   |                                | Dec. 4- Dec. 12, 2009   | 0.95                      | 0.65       | 7.74       |      |
|       | NO <sub>x</sub>   | 11                             | Jul. 10- Jul. 18, 2009  | 0.96                      | 0.69       | 8.53       |      |
|       |                   |                                | Jul. 24-Aug. 1, 2009    | 0.95                      | 0.69       | 5.46       |      |
|       |                   |                                | Nov. 13-Nov. 21, 2009   | 0.96                      | 1.22       | -13.41     |      |
|       |                   |                                | Dec. 4- Dec.12, 2009    | 0.97                      | 0.72       | 14.38      |      |

<sup>a</sup>. ICV: The Intra-Community Variability study



Table S2. Variance explained by the predictors included in the Stage 1 mixed effects model

| Covariate                                 | Unit          | Source (buffer distance)                                                                                        | Threshold <sup>a</sup> | Variances explained |                 |
|-------------------------------------------|---------------|-----------------------------------------------------------------------------------------------------------------|------------------------|---------------------|-----------------|
|                                           |               |                                                                                                                 |                        | NO <sub>2</sub>     | NO <sub>x</sub> |
| Wind speed                                | Meter /second | Gridded Surface Meteorological                                                                                  | -                      | 3%                  | 3%              |
| Minimum air temperature                   | Celsius (°C)  | Data                                                                                                            |                        |                     |                 |
|                                           |               | Gridded Surface Meteorological                                                                                  | -                      | 5%                  | 4%              |
|                                           |               | Data                                                                                                            |                        |                     |                 |
| <b>Spatiotemporal basis 1<sup>b</sup></b> | Log ppb       | Singular value decomposition by                                                                                 | -                      | 19%                 | 13%             |
| Spatiotemporal basis 2                    | Log ppb       | temporal basis function                                                                                         | -                      | 3%                  | 1%              |
| <b>CALINE4 on freeways</b>                | ppb           | CALINE4 Dispersion model NO <sub>x</sub>                                                                        | >180                   | 9%                  | 13%             |
| Caline4 on non-freeways                   | ppb           | from freeway                                                                                                    |                        |                     |                 |
|                                           |               | CALINE4 Dispersion model NO <sub>x</sub>                                                                        | -                      | 3%                  | 5%              |
|                                           |               | from non-freeway                                                                                                |                        |                     |                 |
| <b>Traffic density (300m-5km)</b>         | Vehicles/day  | Distance-decayed annual traffic volume in a scaled by vehicle emission factors (in a donut radii =300 m, 5 km). | -                      | 11%                 | 9%              |
| Distance to FCC1 <sup>c</sup>             | Meter         | Distance to FCC1                                                                                                | >15 km                 | 7%                  | 8%              |
| <b>Population Density</b>                 |               |                                                                                                                 | >21830                 | 5%                  | 11%             |
| <b>Region-level yearly mean</b>           | ppb           | Annual mean concentration for the sub region determined from routine monitoring data                            | -                      | 12%                 | 13%             |
| <b>Spatial autocorrelation</b>            |               | Simulated using Thiessen polygons                                                                               | -                      | 13%                 | 11%             |
| Total                                     |               |                                                                                                                 |                        | 90%                 | 91%             |

<sup>a</sup>: threshold defined to remove the outliers for the covariate;

<sup>b</sup>: bold font highlights the variance explained  $\geq 10\%$  by the variable;

<sup>c</sup>: Feature Class Codes for freeways and highways

Table S3. NO<sub>2</sub> model performance by CHS community in cross validation

| ICV 1 <sup>a</sup> | Samples | Mean (ppb) | Correlation | RMSE <sup>b</sup> | NRMSE <sup>c</sup> | CVRMSE <sup>d</sup> |
|--------------------|---------|------------|-------------|-------------------|--------------------|---------------------|
| Alpine             | 156     | 8.71       | 0.89        | 2.51              | 0.1                | 0.29                |
| Anaheim            | 128     | 30.07      | 0.69        | 4.02              | 0.13               | 0.13                |
| Glendora           | 221     | 20.84      | 0.88        | 3.05              | 0.09               | 0.15                |
| Lake Arrowhead     | 121     | 8.93       | 0.61        | 2.36              | 0.15               | 0.28                |
| Lake Elsinore      | 165     | 10.93      | 0.92        | 1.46              | 0.08               | 0.13                |
| Long Beach         | 162     | 20.2       | 0.98        | 2.59              | 0.07               | 0.13                |
| Mira Loma          | 189     | 13.66      | 0.98        | 1.46              | 0.06               | 0.11                |
| Riverside          | 215     | 16.55      | 0.93        | 2.84              | 0.1                | 0.17                |
| San Bernardino     | 138     | 15.17      | 0.97        | 2.13              | 0.08               | 0.14                |
| San Dimas          | 174     | 25.17      | 0.9         | 2.7               | 0.08               | 0.11                |
| Santa Barbara      | 147     | 11.29      | 0.93        | 2.34              | 0.1                | 0.21                |
| Santa Maria        | 153     | 8.39       | 0.64        | 1.02              | 0.14               | 0.12                |
| Upland             | 232     | 20.14      | 0.95        | 2.73              | 0.08               | 0.14                |

  

| ICV2 <sup>a</sup> | Samples | Mean (ppb) | Correlation | RMSE <sup>b</sup> | NRMSE <sup>c</sup> | CVRMSE <sup>d</sup> |
|-------------------|---------|------------|-------------|-------------------|--------------------|---------------------|
| Anaheim           | 26      | 19.56      | 0.77        | 3.32              | 0.15               | 0.17                |
| Glendora          | 30      | 17.03      | 0.75        | 2.45              | 0.19               | 0.14                |
| Long Beach        | 27      | 20.42      | 0.92        | 3.15              | 0.13               | 0.15                |
| Mira Loma         | 26      | 18.24      | 0.98        | 1.68              | 0.08               | 0.09                |
| Riverside         | 28      | 13.82      | 0.51        | 2.35              | 0.28               | 0.17                |
| San Bernardino    | 40      | 11.07      | 0.71        | 2.41              | 0.16               | 0.22                |
| San Dimas         | 28      | 20.16      | 0.83        | 2.66              | 0.19               | 0.13                |
| Upland            | 28      | 15.79      | 0.75        | 2.56              | 0.18               | 0.16                |

<sup>a</sup>: ICV, The Intra-Community Variability study; <sup>b</sup>: RMSE, root mean square error; <sup>c</sup>: RMSE, root mean square error; NRMSE, normalized RMSE; <sup>d</sup>:CV RMSE, coefficient of variation of the RMSE.

Table S4. NO<sub>x</sub> model performance by CHS community in cross validation

| ICV 1 <sup>a</sup> | Samples | Mean (ppb) | Correlation | RMSE <sup>b</sup> | NRMSE <sup>c</sup> | CVRMSE <sup>d</sup> |
|--------------------|---------|------------|-------------|-------------------|--------------------|---------------------|
| Alpine             | 156     | 18.8       | 0.9         | 4.29              | 0.08               | 0.23                |
| Anaheim            | 128     | 67.25      | 0.95        | 6.59              | 0.08               | 0.1                 |
| Glendora           | 221     | 41.82      | 0.9         | 5.34              | 0.07               | 0.13                |
| Lake Arrowhead     | 121     | 16.12      | 0.68        | 3.7               | 0.13               | 0.23                |
| Lake Elsinore      | 165     | 20.34      | 0.91        | 2.5               | 0.08               | 0.12                |
| Long Beach         | 162     | 63.01      | 0.98        | 8.78              | 0.07               | 0.14                |
| Mira Loma          | 189     | 31.64      | 0.91        | 3.17              | 0.07               | 0.1                 |
| Riverside          | 215     | 35.86      | 0.91        | 5.99              | 0.08               | 0.17                |
| San Bernardino     | 138     | 39.42      | 0.91        | 4.74              | 0.07               | 0.12                |
| San Dimas          | 174     | 52.64      | 0.94        | 5.73              | 0.06               | 0.11                |
| Santa Barbara      | 147     | 26.98      | 0.94        | 6.65              | 0.09               | 0.25                |
| Santa Maria        | 153     | 14.21      | 0.67        | 1.43              | 0.13               | 0.1                 |
| Upland             | 232     | 41.37      | 0.93        | 5.83              | 0.06               | 0.14                |

  

| ICV2 <sup>a</sup> | Samples | Mean (ppb) | Correlation | RMSE <sup>b</sup> | NRMSE <sup>c</sup> | CVRMSE <sup>d</sup> |
|-------------------|---------|------------|-------------|-------------------|--------------------|---------------------|
| Anaheim           | 26      | 33.4       | 0.76        | 8.86              | 0.17               | 0.27                |
| Glendora          | 30      | 24.47      | 0.85        | 3.05              | 0.14               | 0.12                |
| Long Beach        | 27      | 48.92      | 0.97        | 8.09              | 0.08               | 0.17                |
| Mira Loma         | 26      | 33.9       | 0.93        | 6.98              | 0.12               | 0.21                |
| Riverside         | 28      | 19.29      | 0.83        | 2.78              | 0.14               | 0.14                |
| San Bernardino    | 40      | 17.58      | 0.83        | 4.21              | 0.11               | 0.24                |
| San Dimas         | 28      | 29.51      | 0.83        | 4.43              | 0.18               | 0.15                |
| Upland            | 28      | 22.59      | 0.89        | 3.05              | 0.12               | 0.14                |

<sup>a</sup>: ICV, The Intra-Community Variability study; <sup>b</sup>: RMSE, root mean square error; <sup>c</sup>: RMSE, root mean square error; NRMSE, normalized RMSE; <sup>d</sup>: CV RMSE, coefficient of variation of the RMSE.

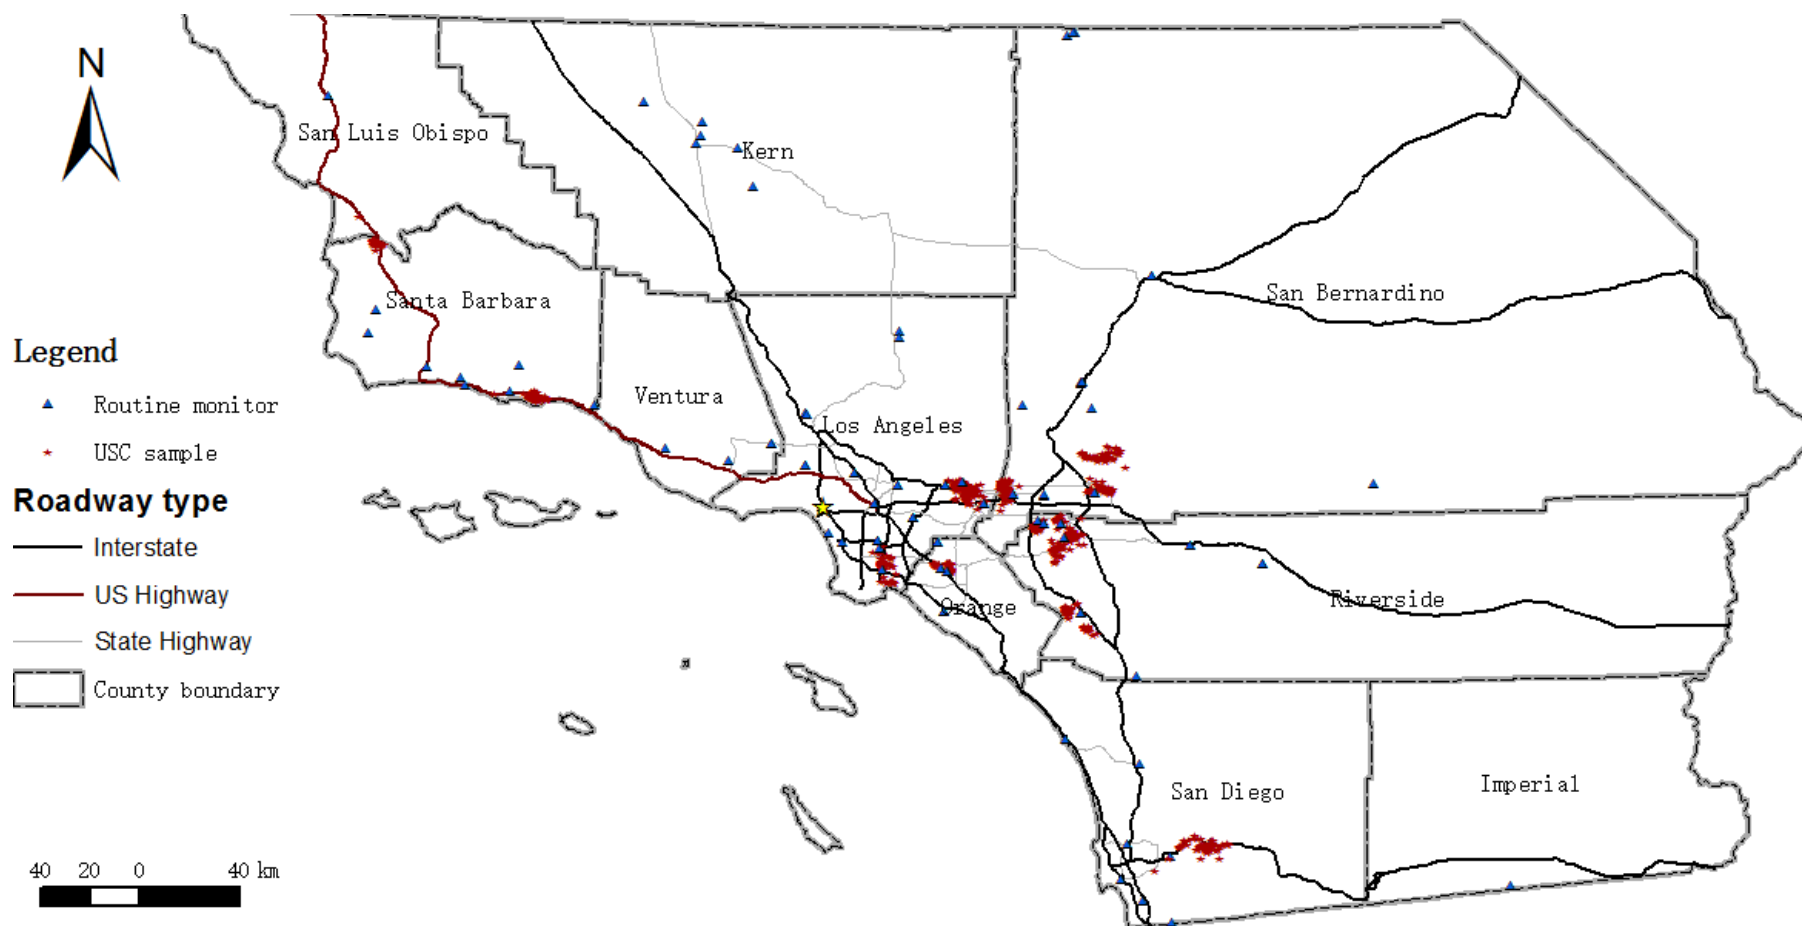

Figure S1. Study region with routine monitoring locations and USC sampling locations (the UCLA and UCI data are not shown due to IRB restrictions)

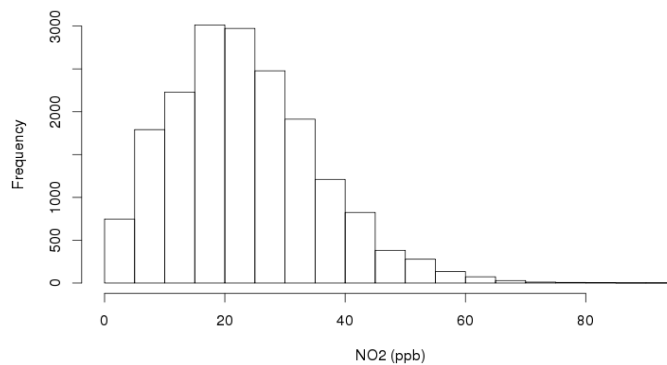

a. Histogram of  $\text{NO}_2$  (with a small right skewness of 0.6)

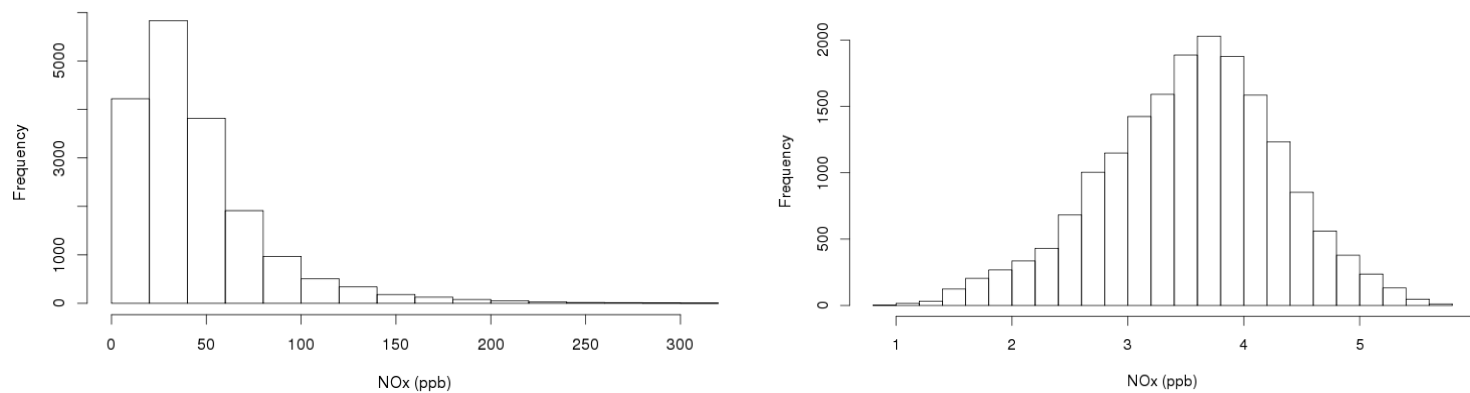

b. Histogram of  $\text{NO}_x$  (left: the original  $\text{NO}_x$  measurements with a big right skewness of 2.0; right: log-transformation with a small skewness of -0.25)

Figure S2. Histograms for  $\text{NO}_2$  and  $\text{NO}_x$  to determine log-transformation (no log transformation for  $\text{NO}_2$ ; log transformation for  $\text{NO}_x$ )

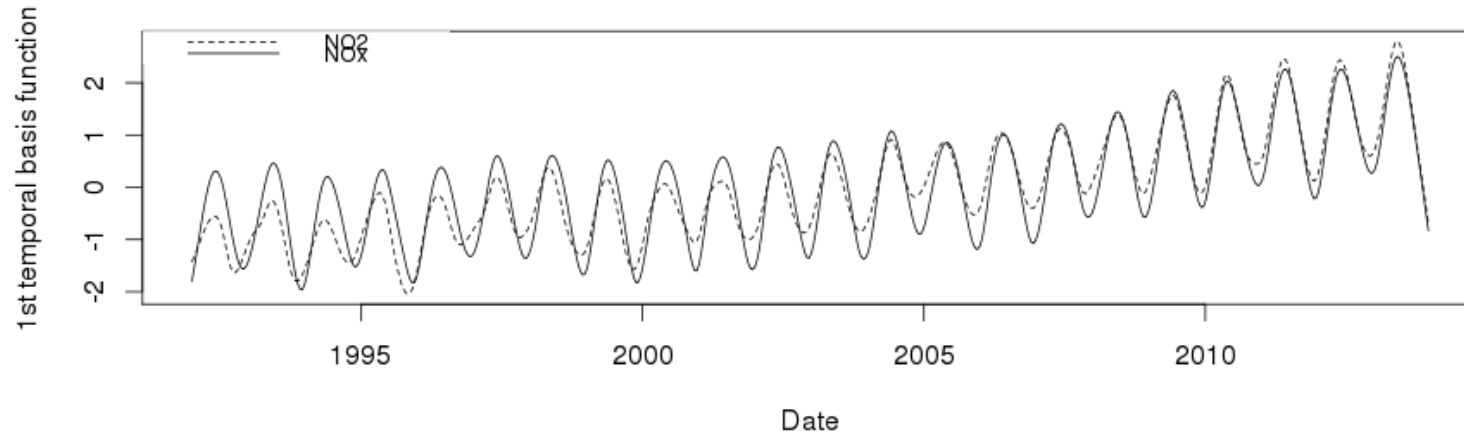

a. the first temporal basis function

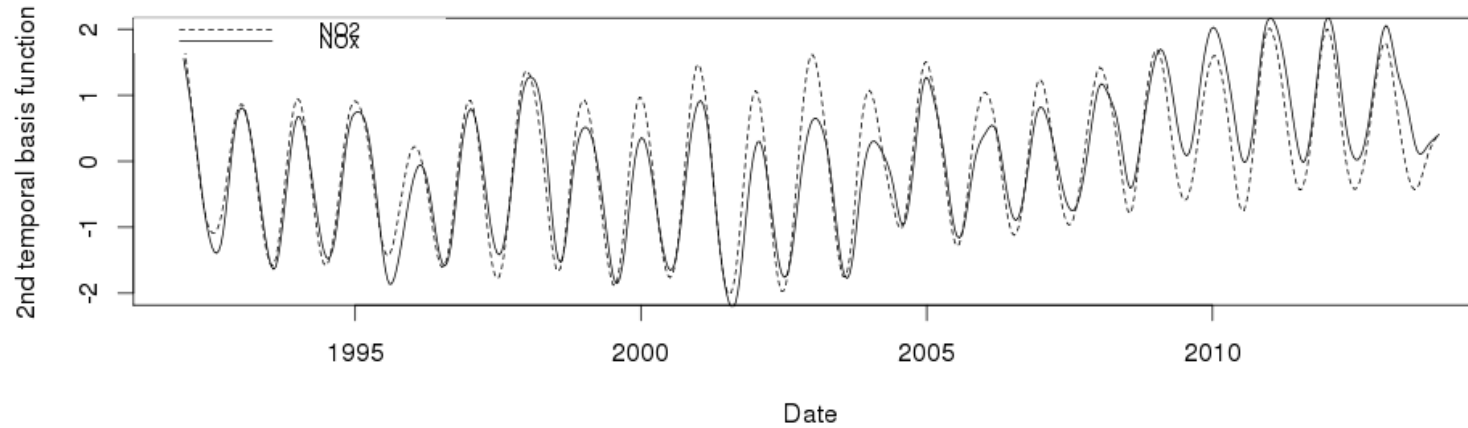

b. the second temporal basis function

Figure S3. The first and second temporal basis functions to reflect the seasonal variability for the study region

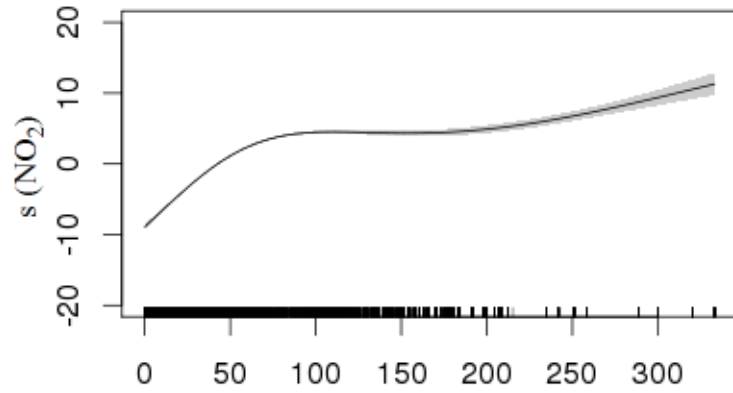

a. Traffic density (buffer distance: 0.3-5 km) for  $\text{NO}_2$

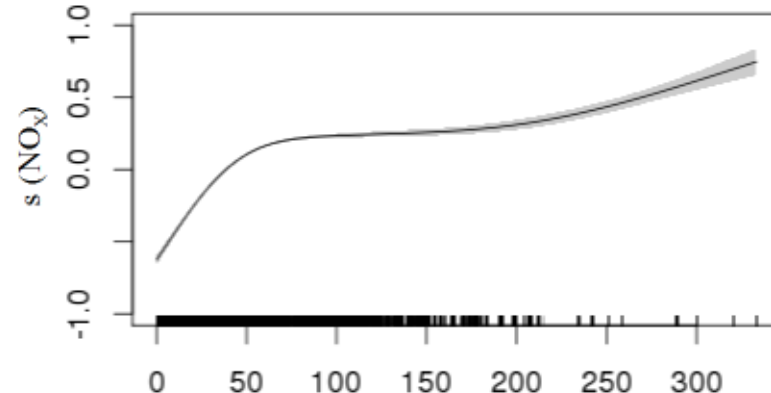

b. Traffic density (buffer distance: 0.3-5 km) for  $\text{NO}_x$

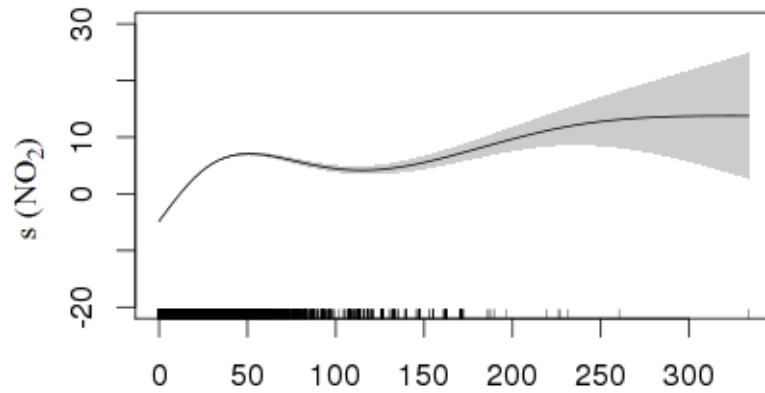

c. CALINE4 output (ppb) on freeways for  $\text{NO}_2$

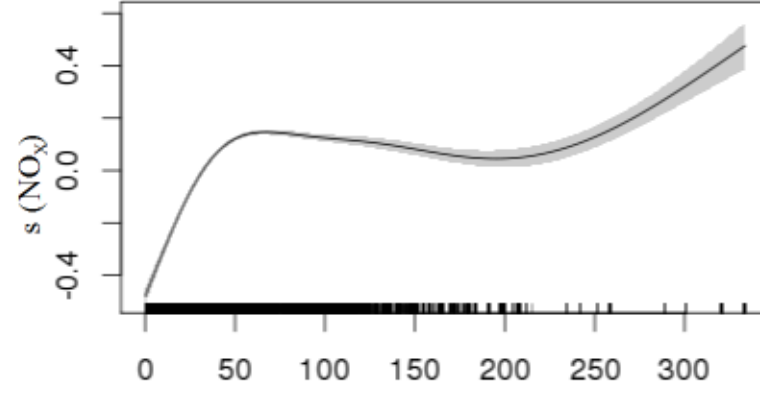

d. CALINE4 output (ppb) on freeways for  $\text{NO}_x$

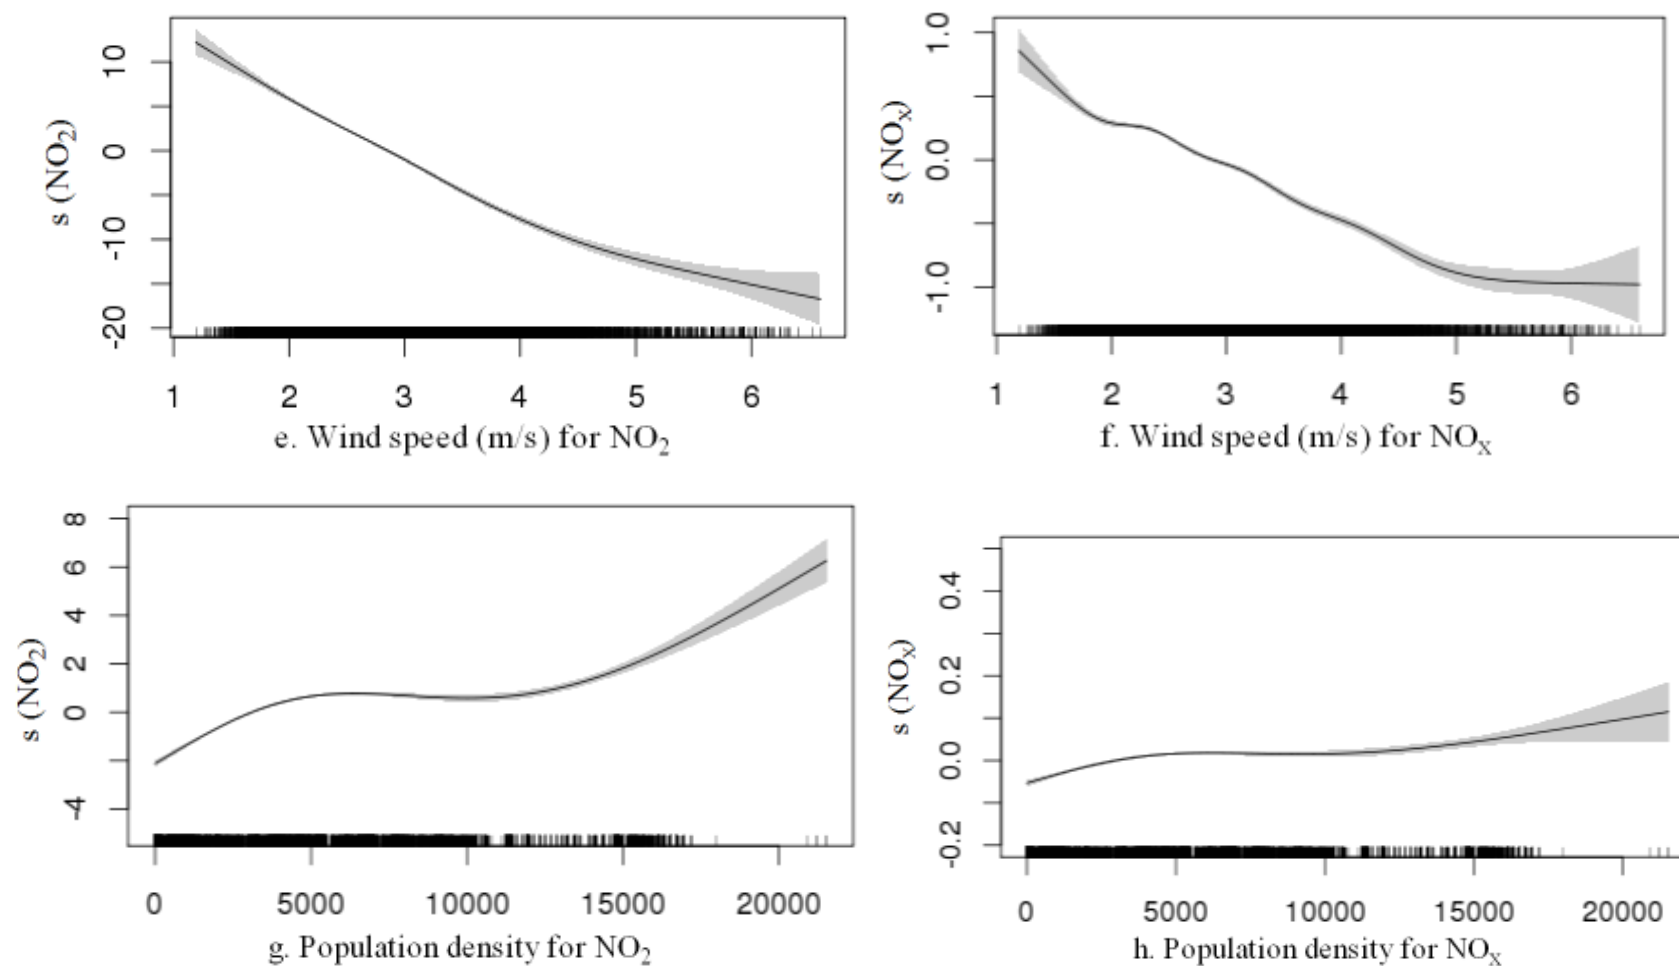

Figure S4. Non-linear association between predictive variables and concentrations by mixed models



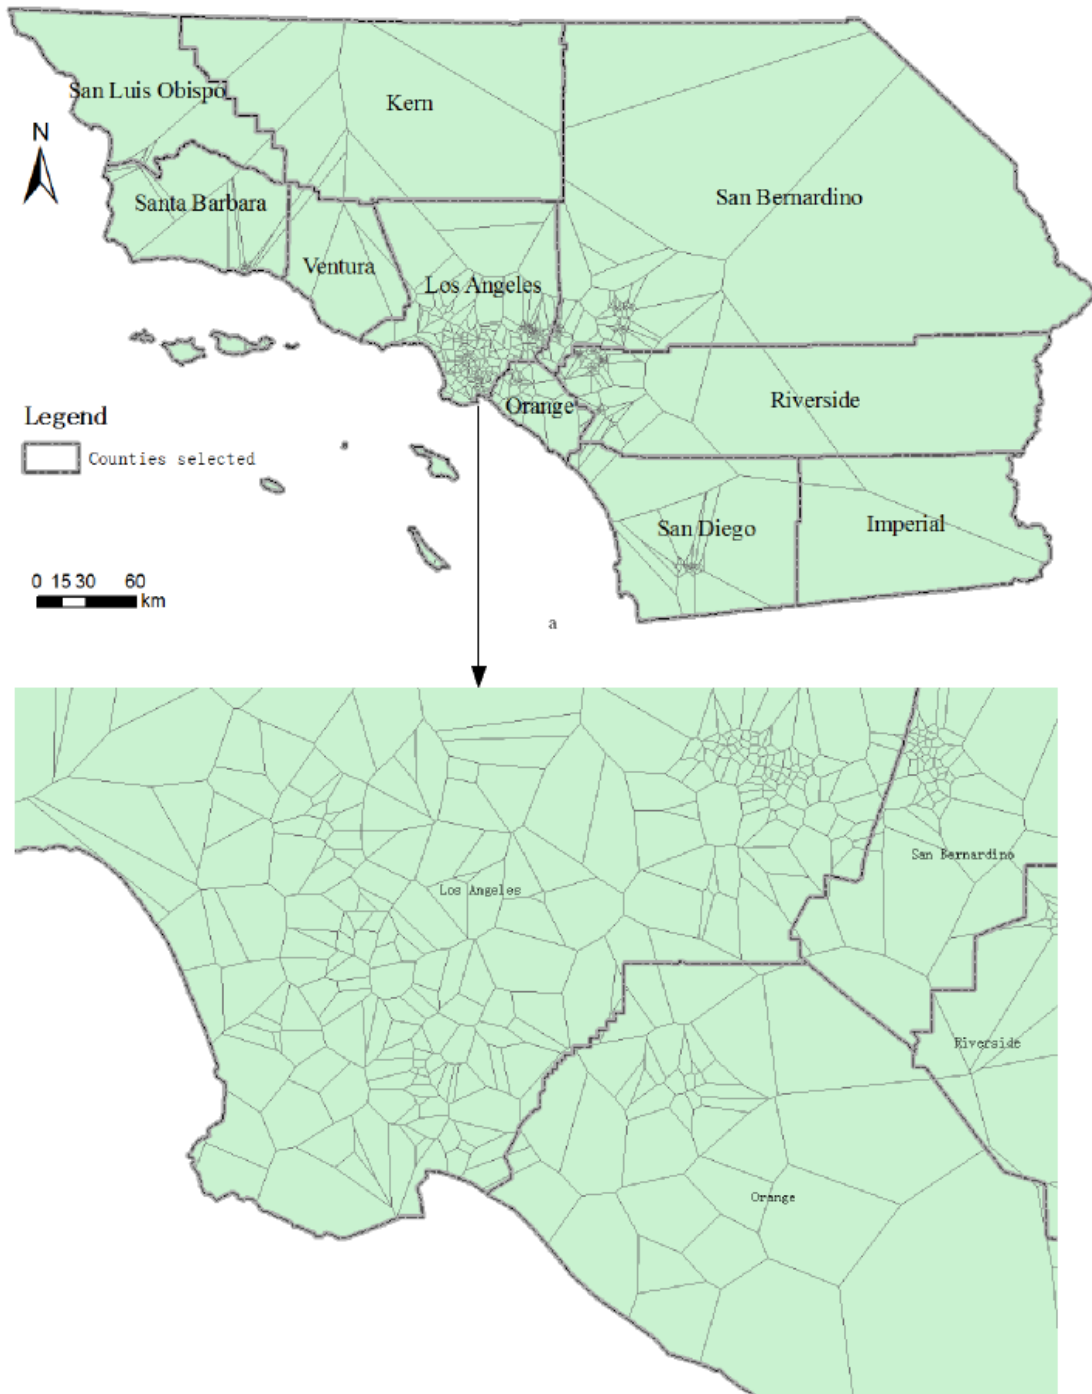

Figure S5. Spatial topology for spatial effect modeling by Thiessen polygons (aggregate distance: 500 m)

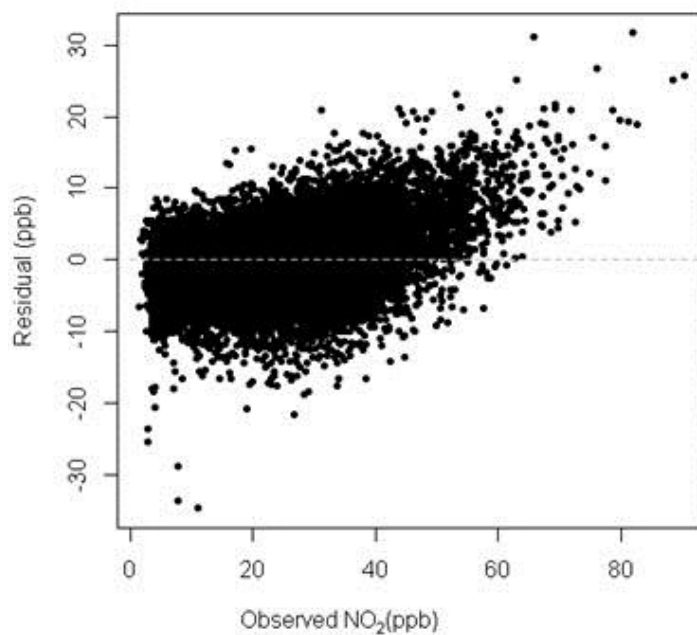

a

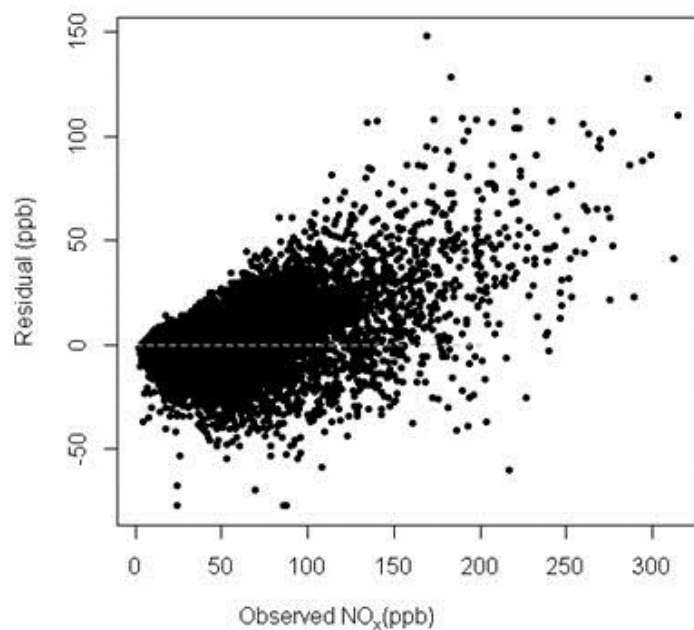

b

Figure S6. Residual plot between observed values vs. residuals (a.  $\text{NO}_2$ ; b.  $\text{NO}_x$ ) for the sample selected by bootstrap aggregating

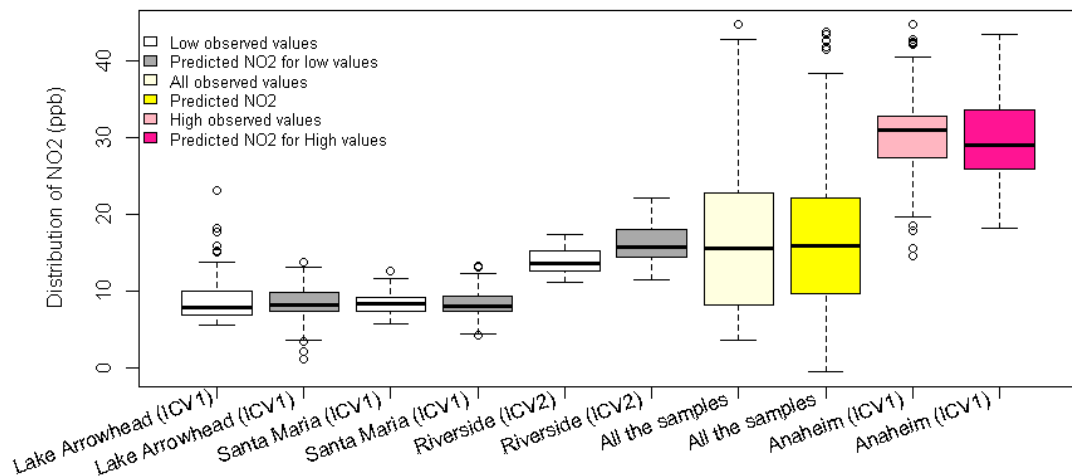

a. NO<sub>2</sub>

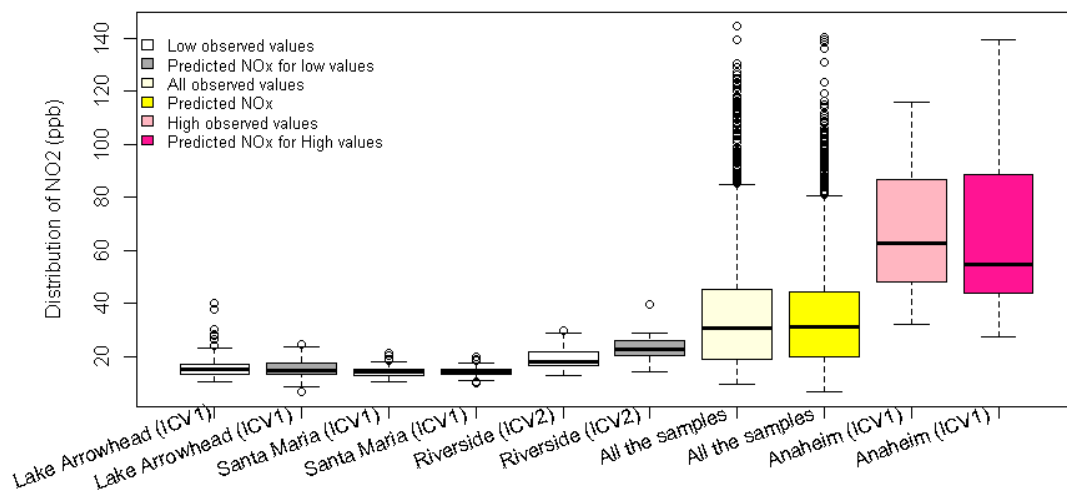

b. NO<sub>x</sub>

Figure S7. Spatial distribution of the predicted and observed NO<sub>2</sub> and NO<sub>x</sub> concentration means across the CHS communities

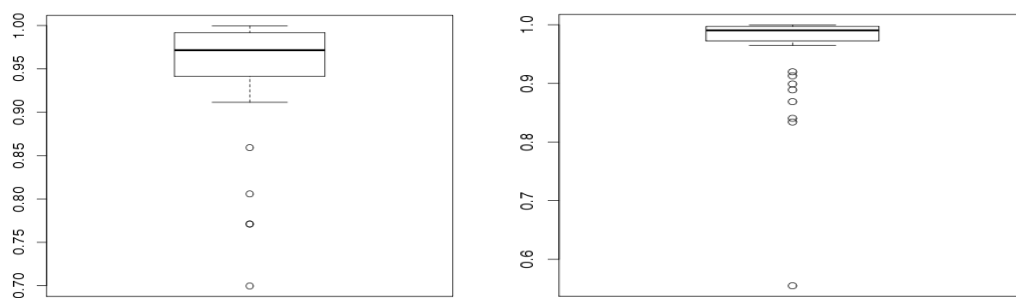

a. NO<sub>2</sub>

b. NO<sub>x</sub>

Figure S8. Boxplot for correlation between constrained prediction and observed values for the time series of 51 routine monitoring stations

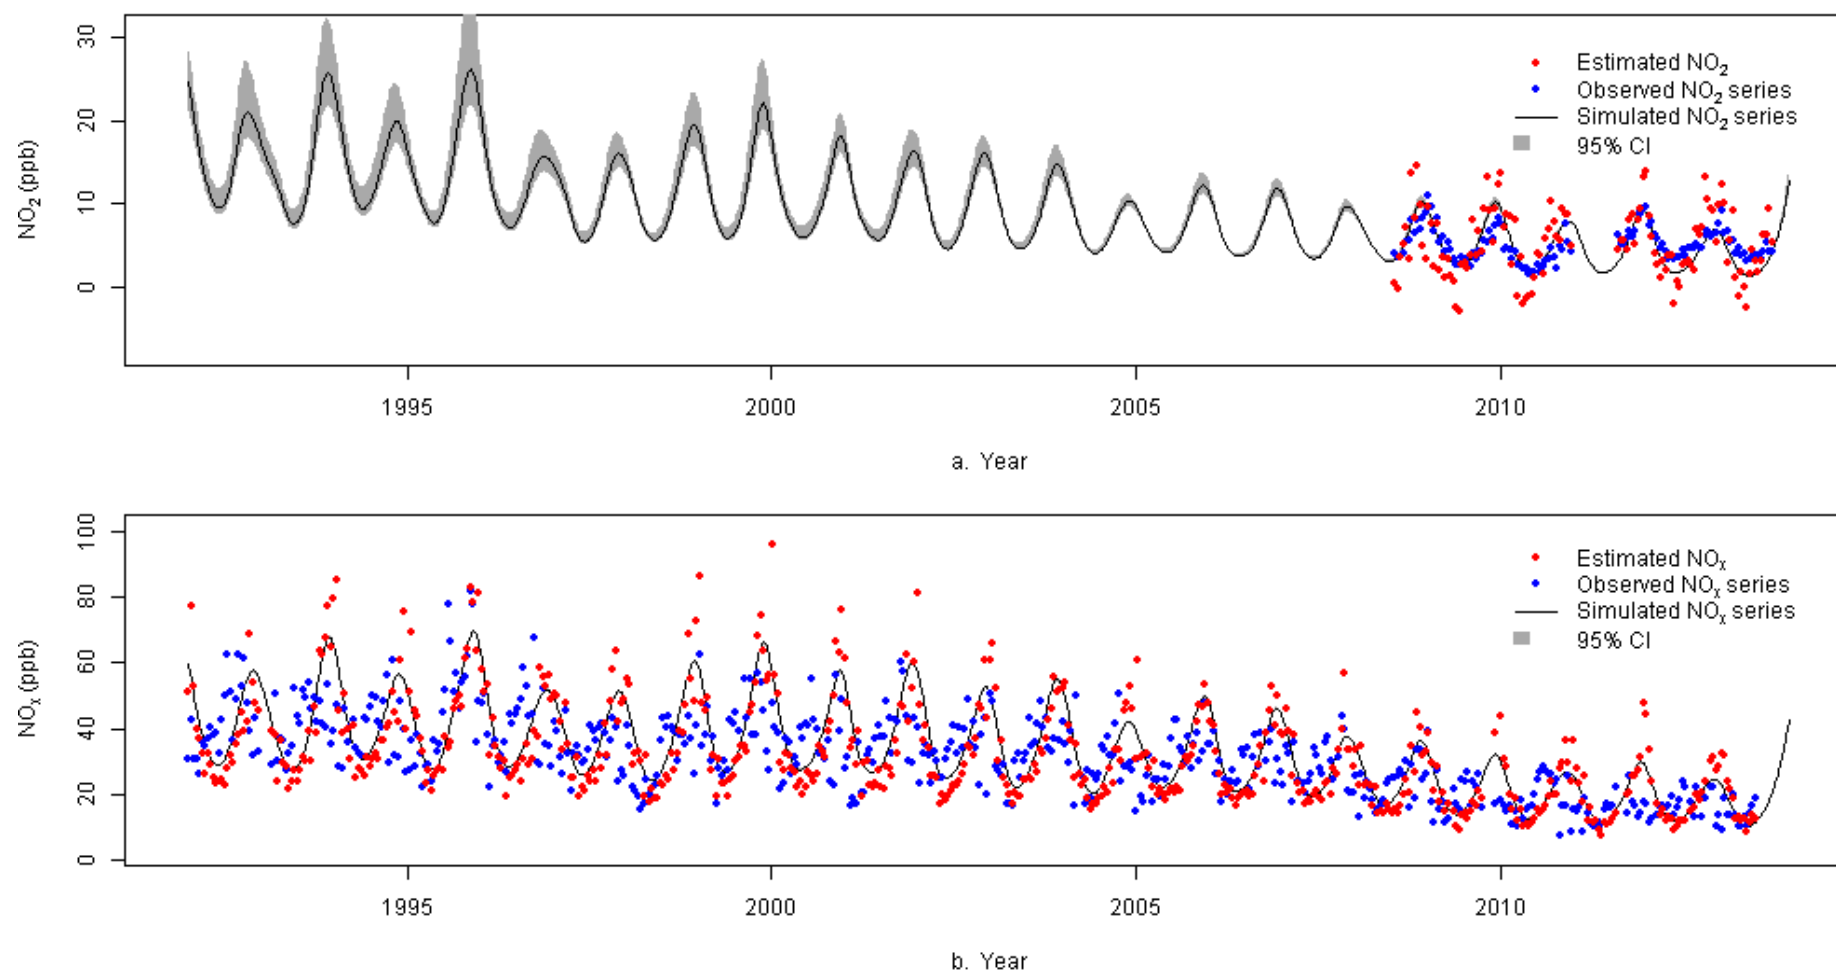

Figure S9. Time series simulated for the routine monitoring sites with the minimum correlation between constrained prediction and observed values (a.0.55 for  $\text{NO}_2$ ; 0.70 for  $\text{NO}_x$ )

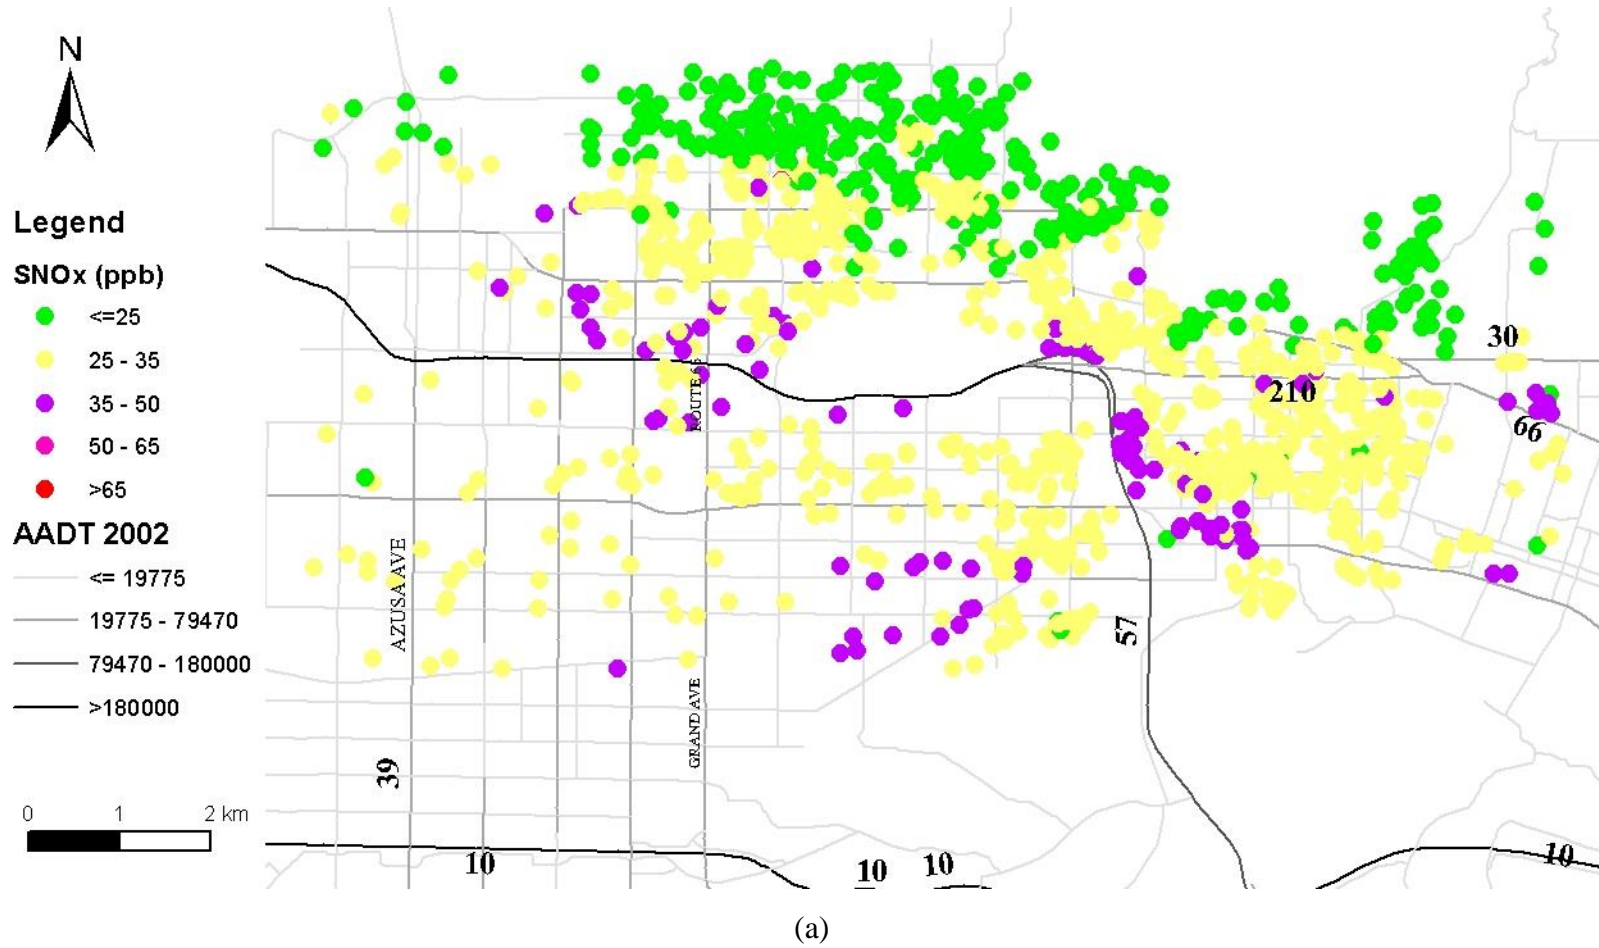

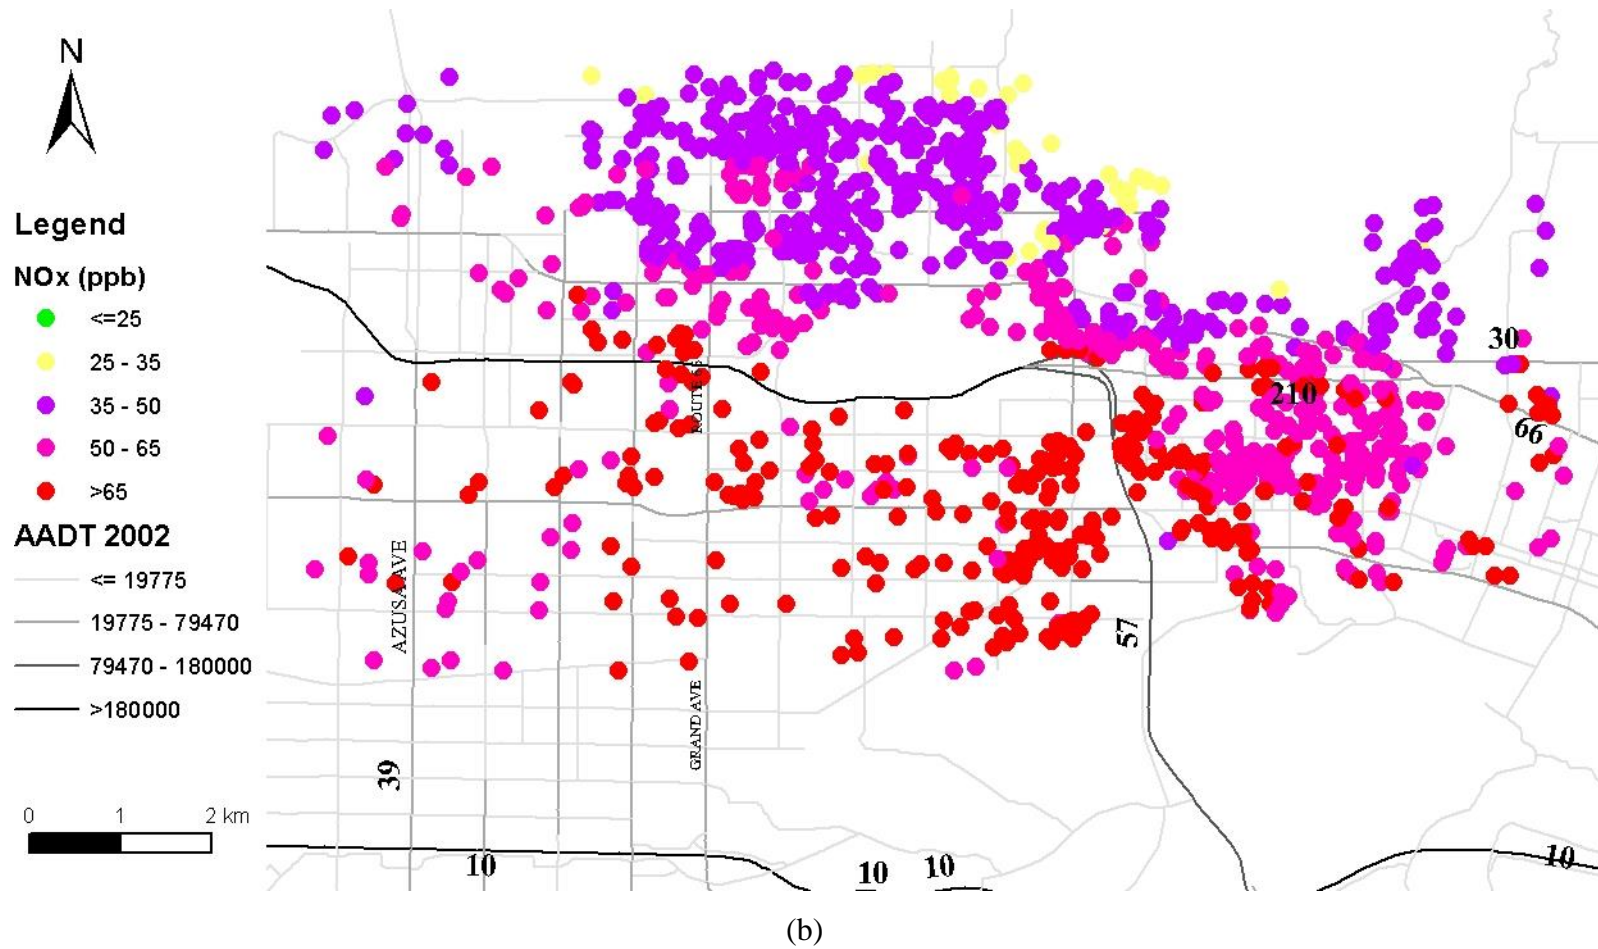

Figure S10. Summer (a) and winter (b) averages of the 2005-2006 biweekly NO<sub>x</sub> at USC ICV1 sampling locations for San Dimas

## References

1. Koutrakis, P.; Wolfson, J. M.; Bunyaviroch, A.; Froehlich, S. A. *Passive Ozone Sampler Based On A Reaction with Nitrite*; Health Effects Institute: Boston, MA, 1994; pp 19-47.
2. Franklin, M.; Vora, H.; Avol, E.; McConnell, R.; Lurmann, F.; Liu, F.; Penfold, B.; Berhane, K.; Gilliland, F.; Gauderman, W. J., Predictors of intra-community variation in air quality. *Journal of exposure science & environmental epidemiology* **2012**, *22*, (2), 135-47.
3. Su, G. J.; Jerrett, M.; Beckerman, B.; Wilhelm, M.; Ghosh, K. J.; Ritz, B., Predicting traffic-related air pollution in Los Angeles using a distance decay regression selection strategy *Environmental Research* **2009**, *109*, (2009), 657-670.
4. Li, L.; Wu, J.; Wilhelm, M.; Ritz, B., Use of generalized additive models and cokriging of spatial residuals to improve land-use regression estimates of nitrogen oxides in Southern California. *Atmospheric Environment* **2012**, *55*, 220-228.
5. Benson, P. *CALINE4: A Dispersion Model for Predicting Air Pollutant Concentrations near Roadways*; California Department of Transportation: Sacramento, CA, 1989.
6. Wu, J.; Houston, D.; Lurmann, F.; Ong, P.; Winer, A., Exposure of PM<sub>2.5</sub> and EC from diesel and gasoline vehicles in communities near the Ports of Los Angeles and Long Beach, California. *Atmos Environ* **2009**, *43*, (12), 1962-1971.
7. California Air Resources Board *EMFAC2011 Technical Document*; 2011.
8. California Air Resources Board *EMFAC2014 Volume III -Technical Documentation*; 2015.
9. Besag, J.; York, J.; Mollié, A., Bayesian image restoration with two applications in spatial statistics *Annals of the Institute of Statistical Mathematics* **1991**, *43*, 1-59.
